# Supplementary material for: Revealing the Mineralogical and Petrographic Signs of Fluid-Related Processes in the Kelebia Basement Area (Szeged Basin, S Hungary): A Case Study of Alpine Prograde Metamorphism in a Permo-Triassic Succession
Source: Hindawi journal article supplement (doi:10.1155/2023/8600576), 2023-01-25
Supplement: f1 [file 8600576.f1.docx]

## **Supplementary Materials**


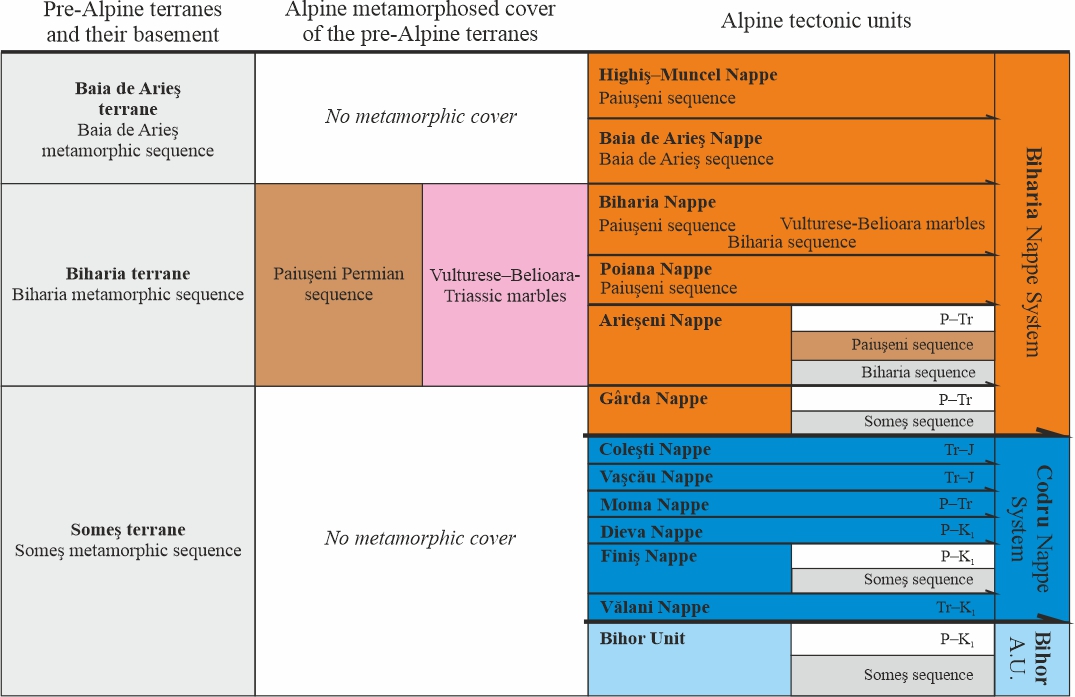


Figure S1: Generalized tectonic stratigraphy of the northern Apuseni Mountains [20]. Abbreviations: P = Permian; Tr = Triassic; J = Jurassic; K = Cretaceous.


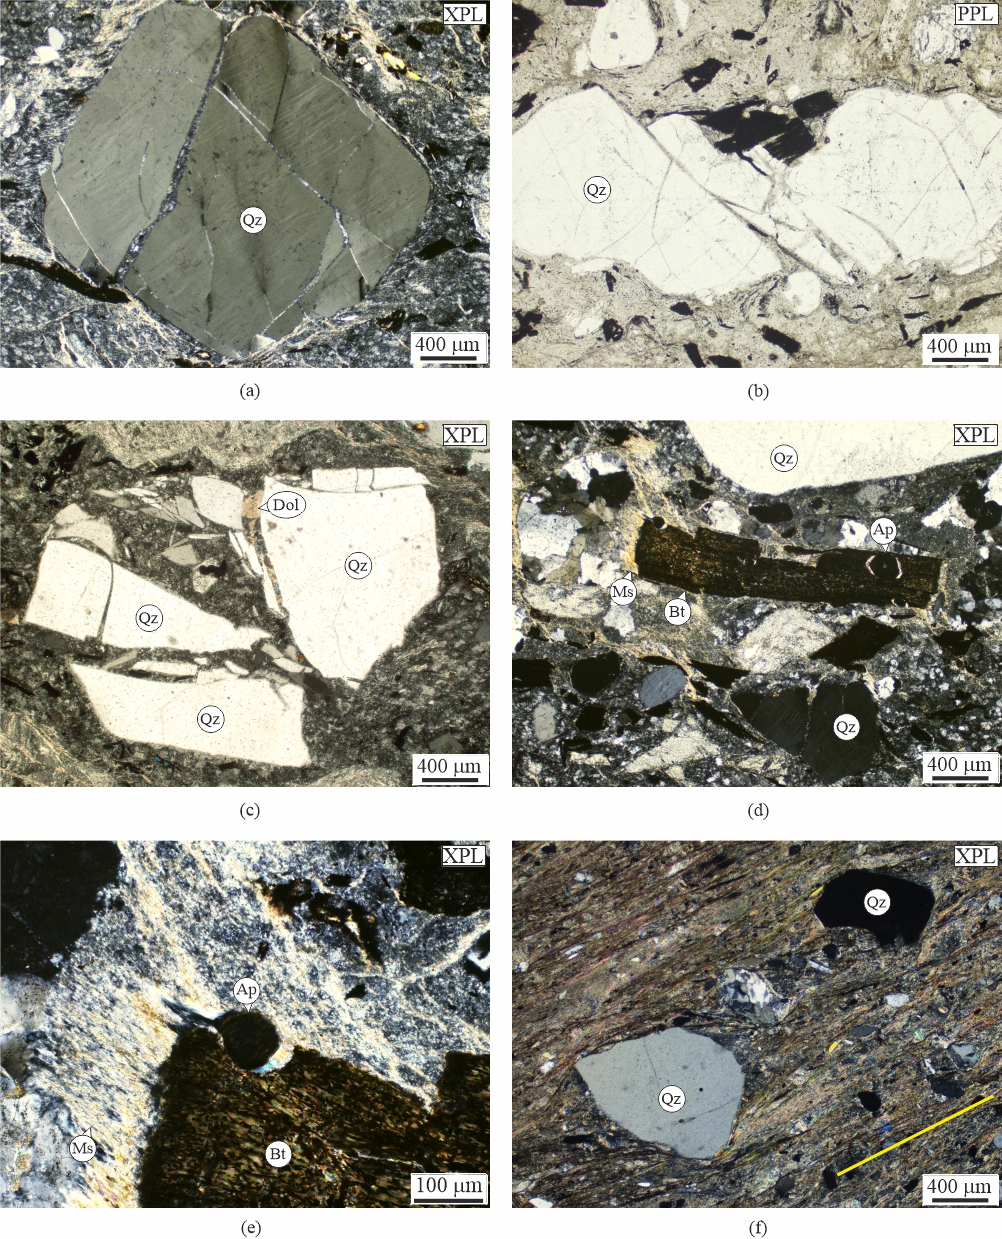


Figure S2: Thin-section photomicrographs of the Permian ignimbrites, Kelebia area: alteration and deformation textures (a–e: well Kel–7 core #8; f: well Kel–23 core #3). (a) Deformation lamellae in a resorbed and fractured quartz phenocryst; (b) and (c) Domino-type and mosaic fragmented quartz crystals. Notice rotated quartz chips that flake off from the original fractured grains; (d) and (e) White mica strain shadow around an apatite grain; (f) Disjunctive foliation in a deformed ignimbrite sample (the trend of the cleavage domains is indicated by the yellow line). Notice mantled quartz clasts with strain shadows associated with strain caps. Abbreviations: PPL = plane-polarized light; XPL = cross-polarized light; Ap = apatite; Bt = biotite; Dol = dolomite; Ms = muscovite; Qz = quartz.

*
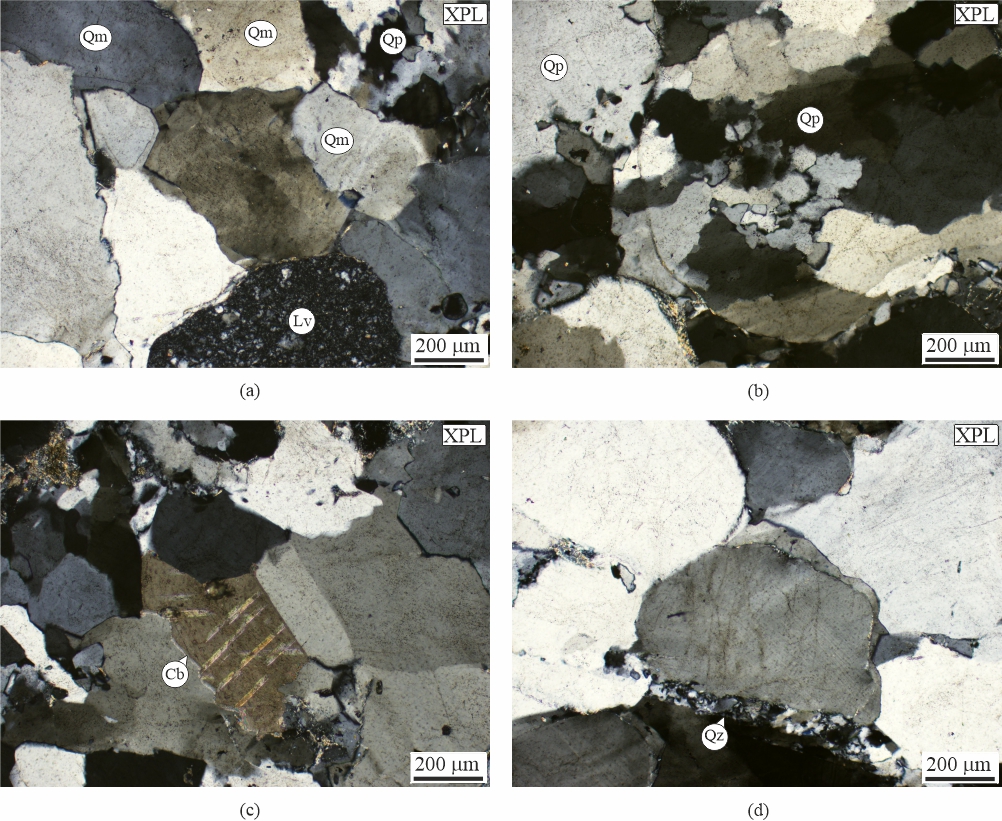
*

Figure S3: Thin-section photomicrographs of the Lower Triassic sandstones (well Móra–1 core #17); (a)–(d) Framework grains with quartz overgrowths. Quartz overgrowth cement postdated by silica (b) and carbonate (c) replacements. Note: Thick (> 1 μm) deformation twins in carbonate. The appearance of tiny quartz veinlets (d) and transgranular microcracks is a characteristic feature. Abbreviations: XPL = cross-polarized light; Cb = carbonate; Lv = volcanic lithic fragment; Qm = monocrystalline quartz; Qp = polycrystalline quartz; Qz = quartz.


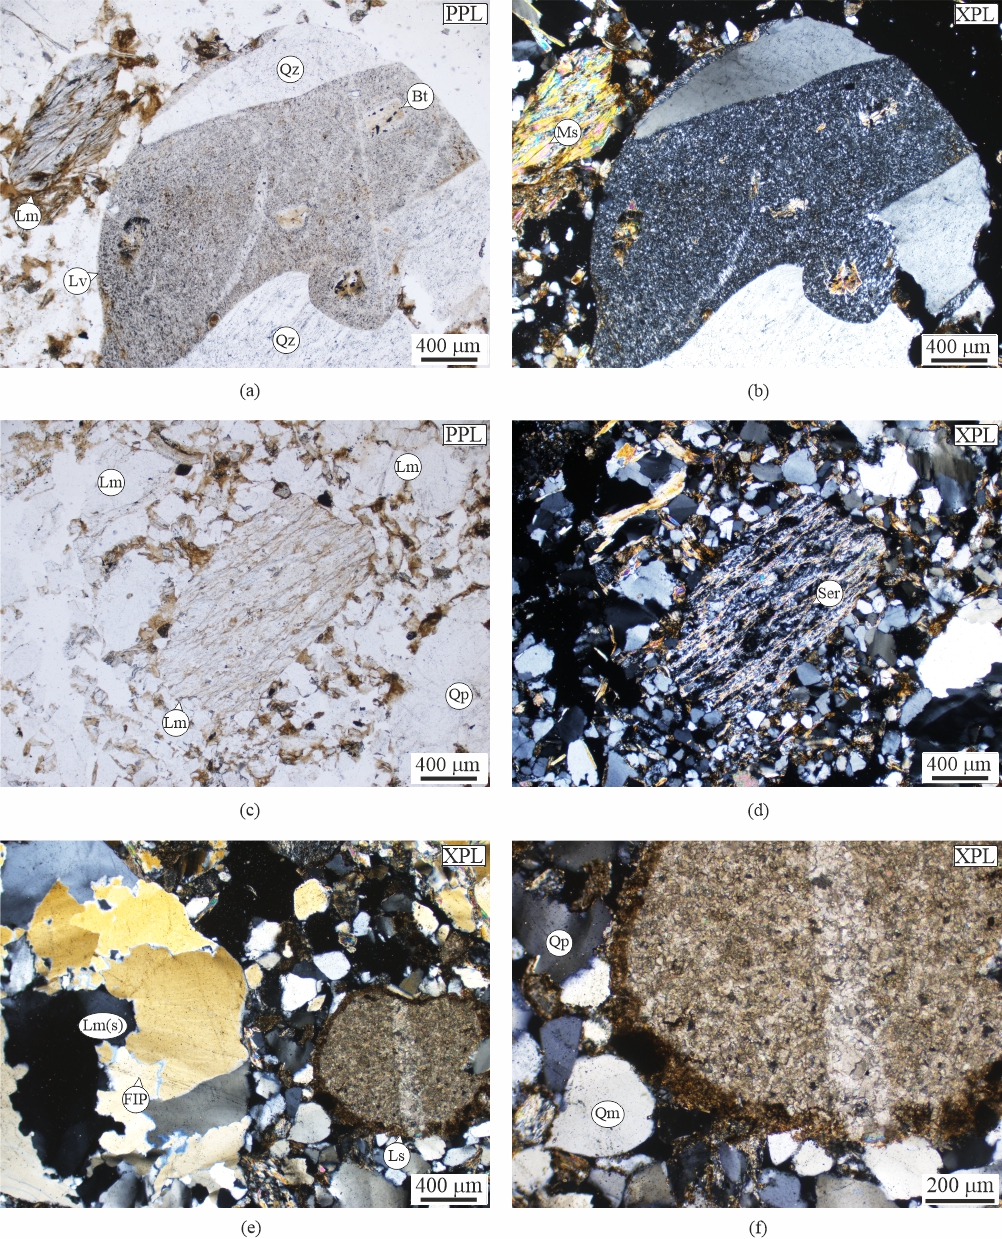


Figure S4: Thin-section photomicrographs of the representative clast types of the Lower Miocene conglomerate (well Ás–É–4 core #3). Abbreviations: PPL = plane-polarized light; XPL = cross-polarized light; FIP = fluid inclusion plain; Lm = metamorphic lithic fragment; Lm(s) = metasedimentary lithic fragment (quartzite); Ls = sedimentary lithic fragment (dolomite); Lv = volcanic lithic fragment; Qm = monocrystalline quartz; Qp = polycrystalline quartz; Bt = biotite; Ms = muscovite; Ser = sericite; Qz = quartz.
